# Supplementary material for: Neural and Behavioral Effects of a Novel Mu Opioid Receptor Antagonist in Binge-Eating Obese People
Source: PubMed Central journal article supplement (PMC3898083; doi:10.1016/j.biopsych.2012.10.022), 2013-05-01
Supplement: mmc1.pdf [file mmc1.pdf]

# **Neural and Behavioral Effects of a Novel Mu Opioid Receptor Antagonist in Binge-Eating Obese People**

## ***Supplemental Information***

### **Supplemental Methods**

In this section we describe the eating behavior measures and the pharmacokinetic parameters that were included in the correlational analyses.

#### **Eating Behavior Measure: the Ad Libitum Buffet**

An ad libitum buffet meal was used to examine eating behavior during the inpatient visits on Days -1, 14, and 28. At pre-specified times during the day, subjects indicated their preferences for the foods to be served at the dinner buffet, on a menu card. Familiar foods from local supermarkets, containing either 20%, 40% or 60% fat were used for the buffet but no information about fat content was provided. Equicaloric portions of all menu options were presented at the dinner buffet at approximately 6 pm for subjects to eat ad libitum for 60 minutes in a comfortable room and while viewing a pre-chosen entertainment program of neutral content. Approximately 6000 calories of food were presented at each buffet meal. The total calories consumed and the ranked preference of each item, were recorded.

#### **Pharmacokinetic Parameters**

For the estimation of pharmacokinetic parameters, plasma concentrations of GSK1521498 were sampled serially on days 1 and 28 at the following times: pre-dose and 1, 2, 3, 6, 8, 12, 14, and 24.5 hours post dose. Additional pre-dose samples were collected on days 7, 14 and 21 for the estimation of steady state (trough) concentrations. Human plasma samples were analyzed for GSK1521498 using a validated analytical method (1) based on protein precipitation, followed by high performance liquid chromatography - tandem mass spectrometry analysis. The lower limit of quantification for GSK1521498 was 0.1 ng/mL using a 50  $\mu$ L aliquot of human plasma with a higher limit of quantification of 100 ng/mL. Quality control (QC) samples, prepared at 3 different analyte concentrations and stored with study samples, were analyzed with each batch of samples against separately prepared calibration standards. For the

analysis to be acceptable, no more than one-third of the total QC results and no more than one-half of the results from each concentration level were to deviate from the nominal concentration by more than 15%. The applicable analytical runs met all predefined run acceptance criteria.

### **Image Acquisition and Analysis**

We used a 3 Tesla Siemens Trio scanner, with a 225 mm field of view at the Wolfson Brain Imaging Centre, Cambridge. 605 volumes were acquired using a T2\*-weighted echo-planar imaging sequence with 36 slices covering the whole brain. Each slice was 3 mm thick with an interslice gap of 1 mm. Slices were interleaved, repetition time = 2100 ms, echo time; TE1 = 13 ms, TE2 = 31 ms, flip angle = 80°, axial orientation = oblique and matrix size.

Data were analyzed using statistical parametric mapping in the SPM5 program ([www.fil.ion.ucl.ac.uk](http://www.fil.ion.ucl.ac.uk)). Images were realigned then spatially normalized to a standard template and spatially smoothed with an isotropic 3 dimensional Gaussian filter (8 mm full width at half-maximum). The time series in each session were high-pass filtered (with cut-off frequency 1/120 Hz) and serial autocorrelations were estimated using an AR(1) model.

Four experimental conditions were modelled using a box car function convolved with a canonical haemodynamic response: High Calorie (e.g. cake) and Low Calorie (e.g. salad) foods, Non-Food High Reward (e.g. mp3 player) and Non-Food Low Reward (e.g. stapler). Conditions were specified as covariates in a general linear model and the beta parameter estimated at each voxel for each stimulus type, was derived from the mean least-squares fit of the model to the data. The responses to each condition were compared to the fixation baseline, and each of these 4 contrasts were taken forward to a group analysis treating inter-subject variability as a random effect.

### **Additional Whole Brain Analysis**

While the imaging analysis focused on key regions of interest, defined anatomically and then functionally (see main text) we also, for completeness carried out a whole brain analysis of drug effects correcting for multiple comparisons across the entire search volume. No significant effects were found surviving this correction.

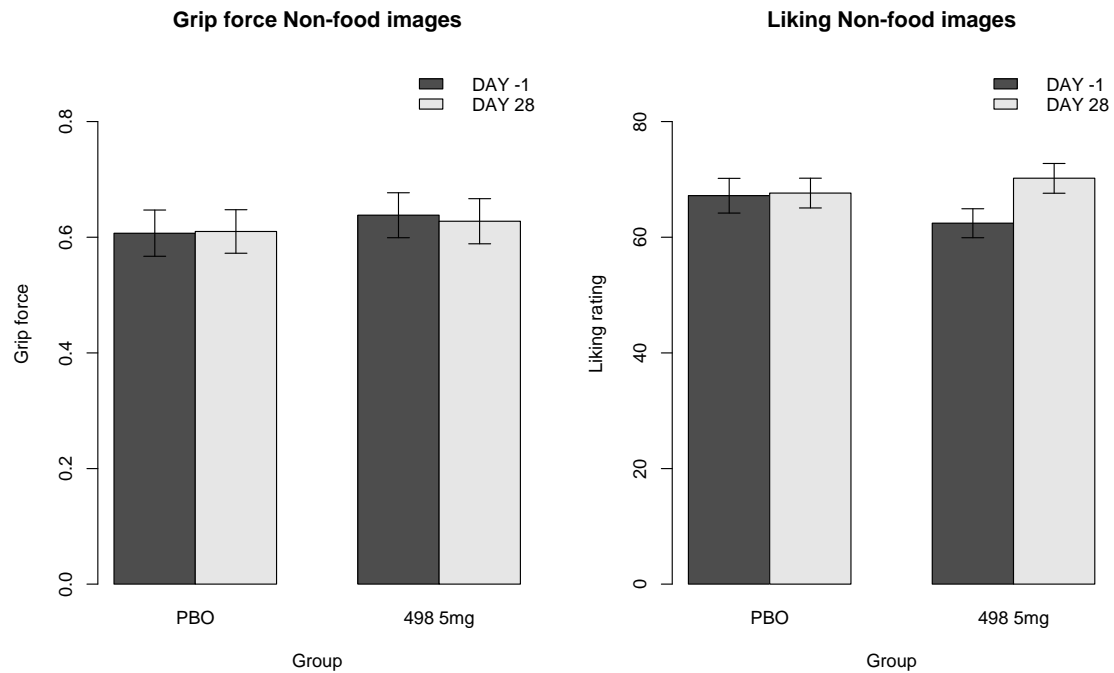

**Figure S1.** Picture surfing task: Comparison of non-food images across both visits and groups. There are no significant main effects or interactions between group and visit.

**Table S1.** Analyses of main effects and interactions for non-food images by group and visit

| <b>Grip Force</b> |           |               |                |                |                |
|-------------------|-----------|---------------|----------------|----------------|----------------|
|                   | <i>df</i> | <b>Sum Sq</b> | <b>Mean Sq</b> | <b>F value</b> | <b>p-value</b> |
| Visit             | 1         | 0.00029       | 0.0002907      | 0.0096         | 0.9221         |
| Group             | 1         | 0.01200       | 0.0120009      | 0.3970         | 0.5305         |
| Visit:Group       | 1         | 0.00090       | 0.0009012      | 0.0298         | 0.8634         |
| <b>Liking</b>     |           |               |                |                |                |
|                   | <i>df</i> | <b>Sum Sq</b> | <b>Mean Sq</b> | <b>F value</b> | <b>p-value</b> |
| Visit             | 1         | 337.6         | 337.57         | 2.3749         | 0.1275         |
| Group             | 1         | 24.2          | 24.20          | 0.1703         | 0.6810         |
| Visit:Group       | 1         | 266.5         | 266.45         | 1.8746         | 0.1750         |

Sq, square.

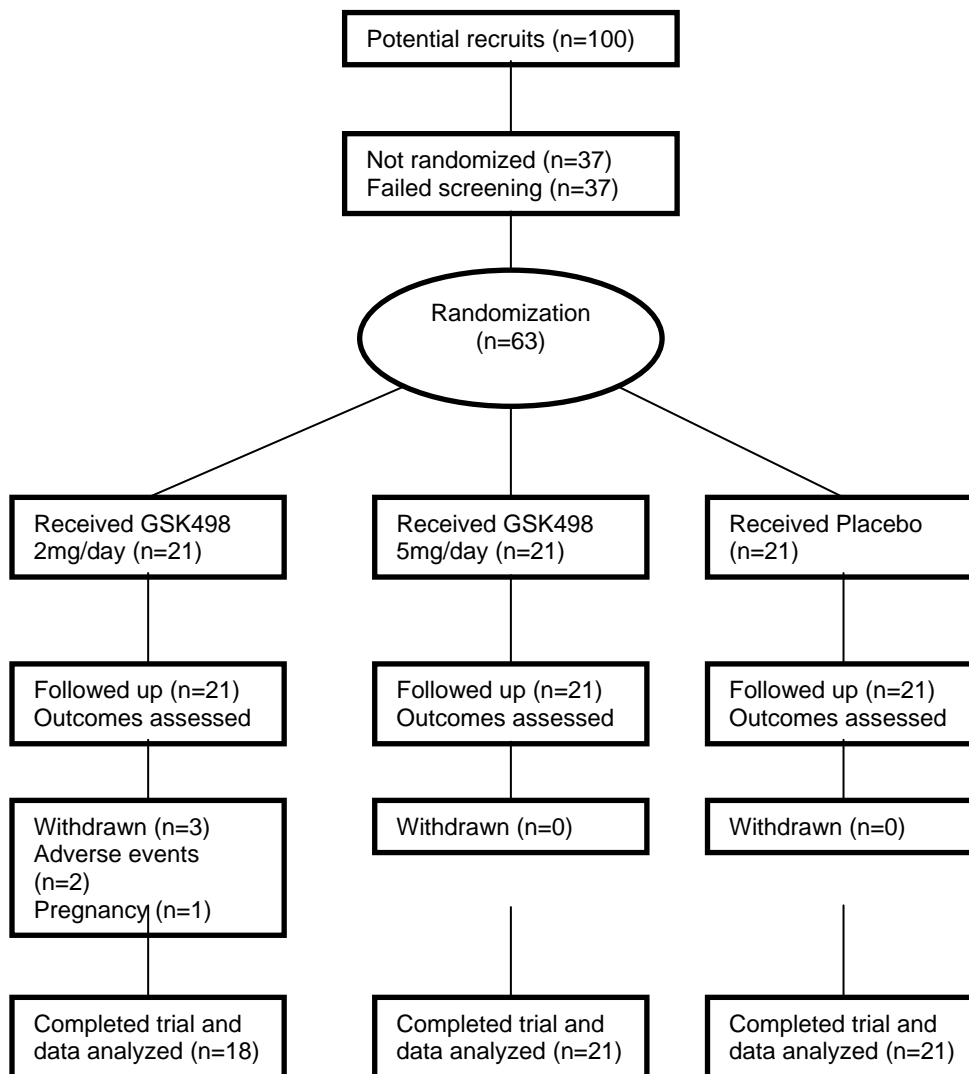

**Figure S2.** CONSORT diagram.

### Supplemental Reference

1. Nathan PJ, O'Neill BV, Bush MA, Koch A, Tao WX, Maltby K, *et al.* (2012): Opioid receptor modulation of hedonic taste preference and food intake: A single-dose safety, pharmacokinetic, and pharmacodynamic investigation with GSK1521498, a novel {micro}-opioid receptor inverse agonist. *J Clin Pharmacol* 52:464-74.
